# Supplementary material
Source: publisher figshare collection journal article supplement (https://acs.figshare.com/ndownloader/files/4710769)

Figure S1, the silver dendrite prepared at 100mM silver ion concentration.

At a higher silver ion concentration, some small nanoparticles also can be found on the formed silver dendrite. The silver dendrite presents a monocrystalline characteristic as described in SAED pattern. The HRTEM image demonstrates that the attached nanoparticles share the same crystallographic with formed crystals.

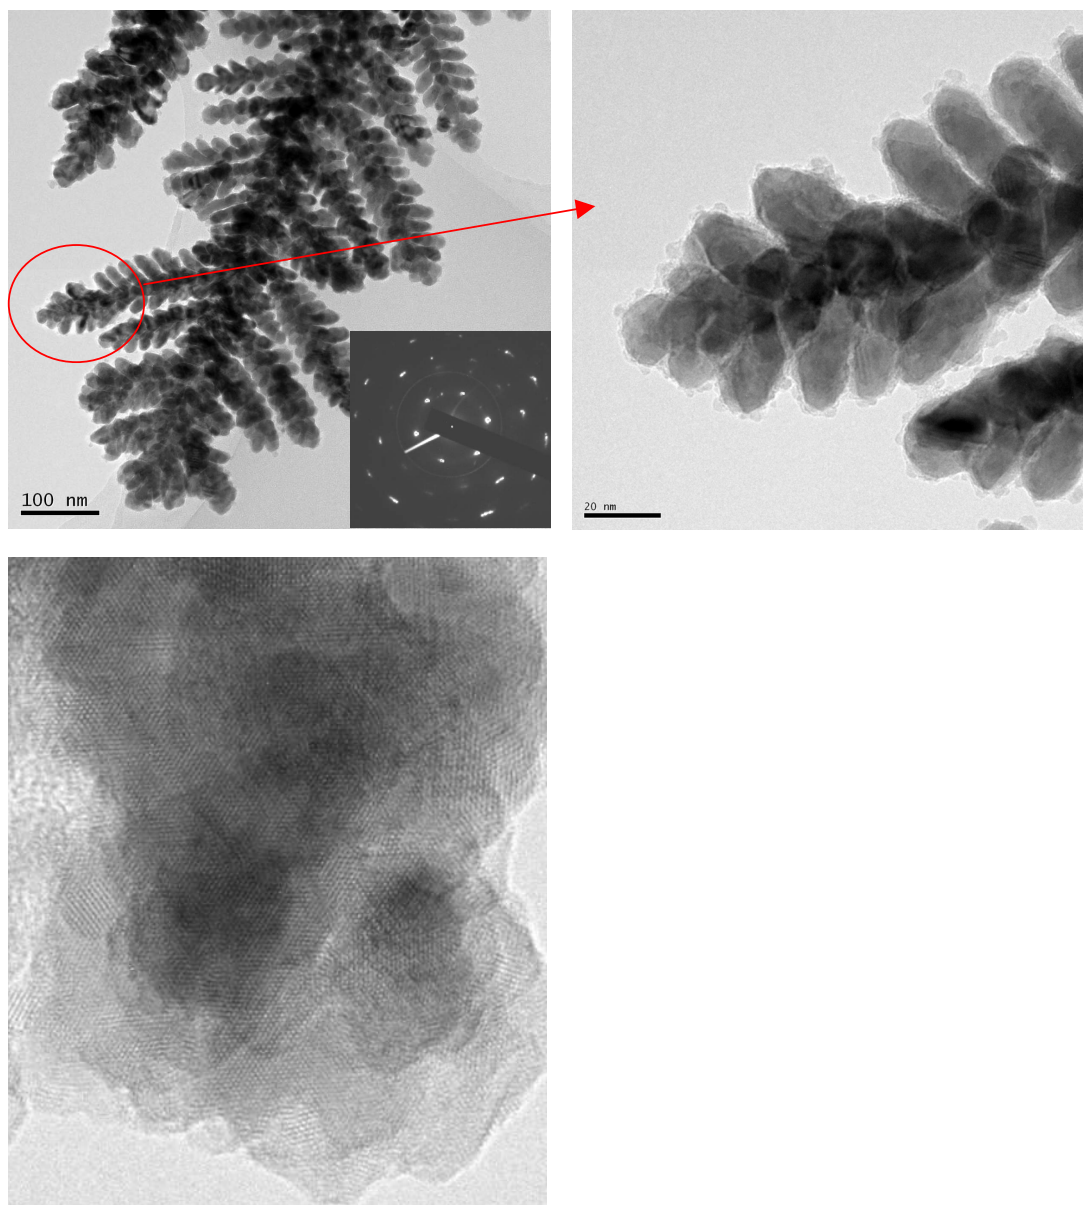

Supplement: Supplementary file 1 [file 4710769]
